# Supplementary material for: Basin-scale impacts of hydropower development on the Mompós Depression wetlands, Colombia
Source: Copernicus journal article supplement (doi:10.5194/hess-22-2839-2018), 2018-05-08
Supplement: Supplementary file 1 [file hess-22-2839-2018-supplement.pdf]

Supplement of Hydrol. Earth Syst. Sci., 22, 2839–2865, 2018  
<https://doi.org/10.5194/hess-22-2839-2018-supplement>  
© Author(s) 2018. This work is distributed under  
the Creative Commons Attribution 4.0 License.

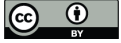

*Supplement of*

## **Basin-scale impacts of hydropower development on the Mompós Depression wetlands, Colombia**

**Héctor Angarita et al.**

*Correspondence to:* Héctor Angarita ([hangarita@javeriana.edu.co](mailto:hangarita@javeriana.edu.co))

The copyright of individual parts of the supplement might differ from the CC BY 4.0 License.

# SI-1. SUPPLEMENTARY INFORMATION

## ReservoirSimulator model description

The ReservoirSimulator allows simulation of the water balance of a group of reservoirs, based on individual or system-level dispatch rules for three main categories of use: downstream instream requirements, hydropower, and other supply (supply that bypasses turbines).

For a given reservoir, the model takes into account physical and technical constraints, such as the volume–elevation curve, tail-water elevation, operational levels (inactive, buffer, technical, and safety), turbine type, capacity, and efficiency. It allows modeling of the topology of reservoirs and tributary sub-basins.

ReservoirSimulator performs a lumped, discrete-time water balance of the components shown in Figure SI-1 with the model parameters and inputs shown in Table SI-1.

For each reservoir, calculations are done according to the sequence in Table SI-2:

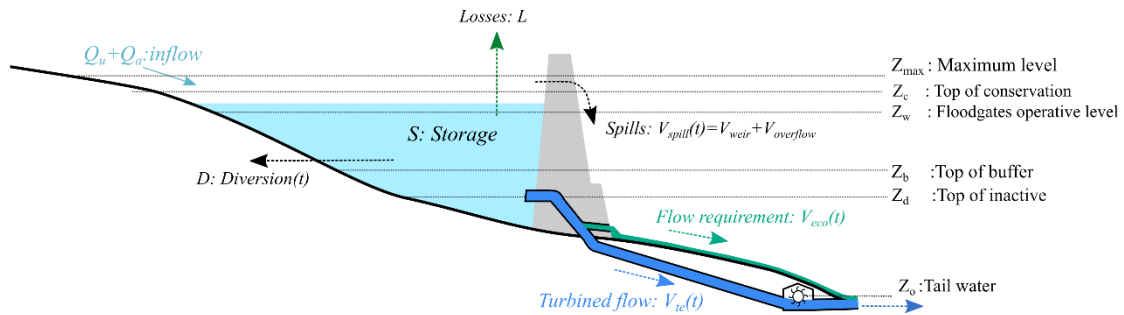

Figure SI-1. Schematic of reservoir inflow, outflow and storage components of the reservoir simulator model.

**Table SI-1. Description of reservoir data requirements of the model**

| Symbol                     | Reservoir physical and technical data                                                                                                                                                                                                                                                                                          | Units   |
|----------------------------|--------------------------------------------------------------------------------------------------------------------------------------------------------------------------------------------------------------------------------------------------------------------------------------------------------------------------------|---------|
| $Q_a(t)$                   | Specific runoff: Runoff from upstream sub-watershed during step $t$ (excludes outflows from upstream infrastructure)                                                                                                                                                                                                           | $m^3/s$ |
| $\Delta t$                 | Time step                                                                                                                                                                                                                                                                                                                      | s       |
| $V_c$                      | Reservoir storage capacity at top of conservation level ( $Z_c$ )                                                                                                                                                                                                                                                              | $m^3$   |
| $V_{buffer}$               | Reservoir storage capacity at buffer level ( $Z_b$ )                                                                                                                                                                                                                                                                           | $m^3$   |
| $V_{min}$                  | Reservoir storage capacity at top of inactive level ( $Z_d$ )                                                                                                                                                                                                                                                                  | $m^3$   |
| $V_{w0}$                   | Reservoir storage capacity at floodgates operative level ( $Z_w$ )                                                                                                                                                                                                                                                             |         |
| $H(V)$                     | Volume-elevation curve of reservoir                                                                                                                                                                                                                                                                                            | masl    |
| $A(V)$                     | Area-elevation curve of reservoir                                                                                                                                                                                                                                                                                              | masl    |
| $B_c$                      | Buffer coefficient: fraction of buffer storage that can be allocated in a given time step<br><i>Note: Can be a user defined function of local (i.e. reservoir storage, etc.) or system-level state variables or context variables (i.e. downstream storage, etc.).</i>                                                         | %       |
| $B_w$                      | Floodgates allocation factor: determines the fraction of storage above the floodgates operational level delivered downstream in a given time step.<br><i>Note: Can be a user defined function of local (i.e. reservoir storage, etc) or system-level state variables or context variables (i.e. downstream storage, etc.).</i> |         |
| $ET(t)$                    | Evaporation rate in a time step $t$                                                                                                                                                                                                                                                                                            | mm      |
| $Z_0$                      | Tail water elevation (water level at the point where turbine flow is discharged)                                                                                                                                                                                                                                               | masl    |
| $D(t)$                     | Water demand diverted from the reservoir, bypassing the turbines, with higher priority than hydropower                                                                                                                                                                                                                         | $m^3$   |
| $V_{eco,1}(t)$             | Average instream flow requirement at step $t$ , for the reach between reservoir and turbines discharge                                                                                                                                                                                                                         | $m^3$   |
| $P$                        | Installed generation capacity                                                                                                                                                                                                                                                                                                  | Mw      |
| $f$                        | Friction loss factor in hydropower load pipes.                                                                                                                                                                                                                                                                                 | m       |
| $N$                        | Number of turbines                                                                                                                                                                                                                                                                                                             |         |
| $E(H,Q)$                   | Turbine efficiency curve, as a function of net head and flow (typically a function of turbine type i.e. Francis, Pelton, etc.)                                                                                                                                                                                                 | %       |
| $e_{target}$               | Minimum efficiency threshold of turbines. Hydropower won't be generated if actual efficiency is lower than $e_{target}$                                                                                                                                                                                                        | %       |
| $Q_w$                      | Floodgates max hydraulic capacity                                                                                                                                                                                                                                                                                              | $m^3/s$ |
| Reservoir topological data |                                                                                                                                                                                                                                                                                                                                |         |
| $K_T$                      | Identifier of the project downstream of turbine flow discharge                                                                                                                                                                                                                                                                 |         |
| $K_E$                      | Identifier of the project downstream of e-flow discharge                                                                                                                                                                                                                                                                       |         |
| $K_S$                      | Identifier of the project downstream of spills discharge                                                                                                                                                                                                                                                                       |         |
| $R$                        | Position of the reservoir in the simulation sequence ( $1^{st}$ , $2^{nd}$ , ...)                                                                                                                                                                                                                                              |         |

**Table SI-2. Sequence of calculations performed by the reservoir simulator model at a given time-step**

| Value         | Description                                                                                                  | Calculation                                                                                                                                                                                                                                                | Units               |
|---------------|--------------------------------------------------------------------------------------------------------------|------------------------------------------------------------------------------------------------------------------------------------------------------------------------------------------------------------------------------------------------------------|---------------------|
| $Q_u(t)$      | Sum of upstream outflows (turbine, e-flows and/or spills) directed to the reservoir                          |                                                                                                                                                                                                                                                            | [m <sup>3</sup> /s] |
| $S_t$         | Reservoir storage at the beginning of step t                                                                 |                                                                                                                                                                                                                                                            | [m <sup>3</sup> ]   |
| $A_t$         | Area of reservoir at the beginning of step t, calculated from area volume curve                              | $A(S_t)$                                                                                                                                                                                                                                                   | [m <sup>2</sup> ]   |
| $L$           | Reservoir losses as evaporation                                                                              | $A_t * ET$                                                                                                                                                                                                                                                 | [m <sup>3</sup> ]   |
| $V_{a_t}$     | Total available water for allocation without restrictions at the reservoir, during step t                    | $\max(0, S_t + (Q_a(t) + Q_u(t)) * \Delta t - L(t) - V_{buffer})$                                                                                                                                                                                          | [m <sup>3</sup> ]   |
| $V_{r_t}$     | Total available water for allocation, from the buffer zone, during step t                                    | $(V_{buffer} - V_{min}) * B_c$ : if $V_{a_t} > 0$<br>$(S_t + Q_a(t) * \Delta t - L(t) - V_{min}) * B_c$ : if $V_{a_t} = 0$                                                                                                                                 |                     |
| $V_{u_t}$     | Total available water for allocation during step t                                                           | $V_{r_t} + V_{a_t}$                                                                                                                                                                                                                                        |                     |
| $Z_t$         | Reservoir water level at the beginning of step t, calculated from volume elevation curve                     | $Z(S_t)$                                                                                                                                                                                                                                                   | masl                |
| $\Delta Z_t$  | Working water head at step t.                                                                                | $Z_t - Z_0$                                                                                                                                                                                                                                                | [m]                 |
| $H_f$         | Friction losses                                                                                              | $\Delta Z_t * f$                                                                                                                                                                                                                                           | [m]                 |
| RPE           | Expected generation at step t, expressed as a percentage of installed capacity.                              | User defined function of local (i.e. reservoir storage at previous timestep, instream flow requirement downstream of turbines, etc) or system-level state variables or context variables (i.e. system level demand, ENSO signal, etc.). See paper Figure 3 | [%]                 |
| $V_{pt}$      | Release requirement, to fulfill 100% of expected energy generation at step t, operating at target efficiency | $RPE * P * 1e6 / (9801 * (\Delta Z_t - H_f) * e_{target}) * \Delta t$                                                                                                                                                                                      | [m <sup>3</sup> ]   |
| $V_{d_t}$     | Total water available during step t, after the allocation of demands with higher priorities than hydropower  | $\max(0, V_{u_t} - D_t - V_{eco,1})$                                                                                                                                                                                                                       | [m <sup>3</sup> ]   |
| $V_{te}$      | Effective turbined volume during step t                                                                      | $\min(V_{pt}, V_{d_t})$                                                                                                                                                                                                                                    | [m <sup>3</sup> ]   |
| $Q_{te}$      | Effective turbined flow during step t                                                                        | $V_{te} / \Delta t$                                                                                                                                                                                                                                        | [m <sup>3</sup> /s] |
| $V_{s_t}$     | Water available after hydropower is allocated.                                                               | $V_{d_t} - V_{te}$                                                                                                                                                                                                                                         | [m <sup>3</sup> ]   |
| $V_w$         | Controlled spill volume (floodgates operation)                                                               | with:<br>$V_w = \min(R_w^{1/B_w}, Q_w * \Delta t)$<br>$R_w = \max(0, V_{s_t} - V_{w0})$ : Volume above the floodgates operational level                                                                                                                    | [m <sup>3</sup> ]   |
| $V_{s_w}$     | Water available after controlled spill is allocated.                                                         | $V_{s_t} - V_w$                                                                                                                                                                                                                                            | [m <sup>3</sup> ]   |
| $V_{spill_t}$ | Total spill during step t                                                                                    | $\max(0, V_{s_w} - V_c)$                                                                                                                                                                                                                                   | [m <sup>3</sup> ]   |

| Value     | Description                                                                                                                                                                                     | Calculation                                     | Units |
|-----------|-------------------------------------------------------------------------------------------------------------------------------------------------------------------------------------------------|-------------------------------------------------|-------|
| $P_n$     | Net power output if available flow is turbined given $H_{n,t}$ , using n turbines.                                                                                                              | $\gamma * \frac{Q_{te}}{n} * H_{n,t} * e_{t,n}$ | [Mw]  |
| $e_{t,n}$ | Actual Turbine/Generator efficiency given $(\Delta Z_t - H_f)$ and flow = $\frac{Q_{te}}{n}$ . See example in Figure SI-2.<br>If efficiency is lower than a target efficiency, is adopted as 0. | $e_n$<br>0 if $e_n < e_{target}$                | %     |
| $P_t$     | Average power output during step t                                                                                                                                                              | $\max(P_1, 2 * P_2, \dots N * P_N)$             | [Mw]  |
| $S_{t+1}$ | Reservoir storage at the beginning of step t+1                                                                                                                                                  | $V_{S_t} - V_{spill_t}$                         | $m^3$ |

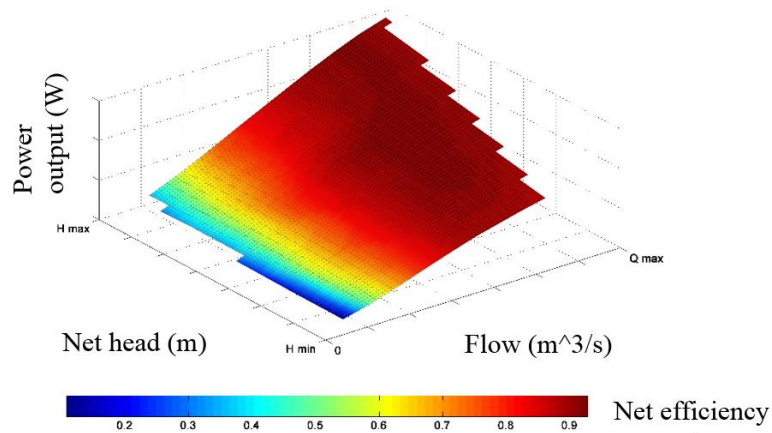

**Figure SI-2. Example of a turbine power–efficiency function (Francis type)**
